# Supplementary material for: Echocardiography protocol and cardiometabolic phenotyping in Indian birth cohorts—the IndEcho study
Source: PubMed Central journal article supplement (PMC10372793; doi:10.3389/fcvm.2023.1055454), 2023-07-13
Supplement: Datasheet1.pdf [file Datasheet1.pdf]

**Supplementary Table 1: Comparison of baseline ECHO characteristics among healthy individuals and individuals with pre-existing co-morbidities (Diabetes, Hypertension, Cardiac disease)**

| Variables (units)                                              | Pre-existing comorbidities present |                             |      |                             | P value |
|----------------------------------------------------------------|------------------------------------|-----------------------------|------|-----------------------------|---------|
|                                                                | YES                                |                             | NO   |                             |         |
|                                                                | N                                  | Mean (SD) / Median (IQR)    | N    | Mean (SD) / Median (IQR)    |         |
| Age (years)                                                    | 1105                               | <b>46.06</b> (1.12)         | 1217 | <b>45.93</b> (1.12)         | 0.005   |
| Height (cm)                                                    | 1099                               | <b>163.35</b> (9.11)        | 1216 | <b>160.98</b> (9.01)        | <0.001  |
| Weight (kg)                                                    | 1099                               | <b>73.31</b> (14.69)        | 1216 | <b>65.25</b> (14.09)        | <0.001  |
| BMI (kg/m <sup>2</sup> )                                       | 1098                               | <b>27.43</b> (4.82)         | 1216 | <b>25.16</b> (4.95)         | <0.001  |
| Body surface area (m <sup>2</sup> )                            | 1098                               | <b>1.79</b> (0.20)          | 1216 | <b>1.68</b> (0.19)          | <0.001  |
| SBP (mmHg)                                                     | 1099                               | <b>137.70</b> (19.53)       | 1215 | <b>117.97</b> (11.28)       | <0.001  |
| DBP (mmHg)                                                     | 1099                               | <b>87.78</b> (12.45)        | 1215 | <b>73.59</b> (9.09)         | <0.001  |
| Pulse                                                          | 1099                               | <b>85.43</b> (11.86)        | 1215 | <b>81.20</b> (10.64)        | <0.001  |
| <b>CARDIAC SIZE</b>                                            |                                    |                             |      |                             |         |
| LVIDD (mm)                                                     | 1074                               | <b>46.08</b> (5.75)         | 1201 | <b>44.69</b> (4.97)         | <0.001  |
| LVISD (mm)                                                     | 1074                               | <b>29.84</b> (4.11)         | 1201 | <b>28.85</b> (3.49)         | <0.001  |
| Fractional shortening                                          | 1074                               | <b>0.35</b> (0.05)          | 1201 | <b>0.35</b> (0.04)          | 0.468   |
| PWT (mm)                                                       | 1074                               | <b>9</b> (8.33, 9.67)       | 1201 | <b>8.67</b> (8, 9)          | <0.001  |
| Septal thickness (mm)                                          | 1074                               | <b>10</b> (9, 10.33)        | 1201 | <b>9.33</b> (9, 10)         | <0.001  |
| Relative wall thickness (no units)                             | 1074                               | <b>0.40</b> (0.06)          | 1201 | <b>0.39</b> (0.07)          | <0.001  |
| LVEDV (4c) (ml)                                                | 1021                               | <b>63.60</b> (18.05)        | 1162 | <b>62.04</b> (16.32)        | 0.132   |
| LVESV (4c)(ml)                                                 | 1021                               | <b>22.56</b> (6.99)         | 1162 | <b>21.52</b> (5.96)         | 0.003   |
| LV mass (2D) (g)                                               | 989                                | <b>117</b> (100, 140)       | 1140 | <b>105</b> (89.9, 122.5)    | <0.001  |
| LV mass <sup>i</sup> (indexed for BSA, 2D) (g/m <sup>2</sup> ) | 983                                | <b>66.26</b> (58.09, 77.35) | 1139 | <b>63.03</b> (55.05, 72.25) | <0.001  |
| <b>Categories of LV re-modelling/hypertrophy</b>               |                                    |                             |      |                             |         |
| None N (%) <sup>#</sup>                                        |                                    | <b>620</b> (63.98)          |      | <b>807</b> (71.42)          |         |
| Concentric remodelling N (%) <sup>#</sup>                      |                                    | <b>299</b> (30.86)          |      | <b>287</b> (25.40)          | 0.001   |
| Concentric hypertrophy N (%) <sup>#</sup>                      |                                    | <b>18</b> (1.86)            |      | <b>9</b> (0.80)             |         |
| Eccentric hypertrophy N (%) <sup>#</sup>                       |                                    | <b>32</b> (3.30)            |      | <b>27</b> (2.39)            |         |
| <b>SYSTOLIC FUNCTION</b>                                       |                                    |                             |      |                             |         |
| LV ejection fraction (%) <sup>†</sup>                          |                                    |                             |      |                             |         |
|                                                                | 1021                               | <b>64.98</b> (62.59, 67.13) | 1162 | <b>65.65</b> (63.27, 67.64) | <0.001  |
| Low LV ejection fraction N (%)                                 |                                    | <b>14</b> (1.37)            |      | <b>6</b> (0.52)             |         |
| <b>Global longitudinal strain (GLS)</b>                        |                                    |                             |      |                             |         |
| Average GLS                                                    | 1096                               | <b>-18.55</b> (2.33)        | 1213 | <b>-19.43</b> (2.82)        | <0.001  |
| GLS 2c                                                         | 1084                               | <b>-18.53</b> (2.63)        | 1202 | <b>-19.47</b> (3.25)        | <0.001  |
| GLS 4c                                                         | 1092                               | <b>-19.60</b> (2.45)        | 1213 | <b>-20.28</b> (2.99)        | <0.001  |
| GLS long axis                                                  | 969                                | <b>-17.51</b> (3.35)        | 1115 | <b>-18.62</b> (3.50)        | <0.001  |
| <b>Categories of GLS</b>                                       |                                    |                             |      |                             |         |
| Normal N (%) <sup>β</sup>                                      |                                    | <b>885</b> (80.75)          |      | <b>1090</b> (89.86)         |         |
| Borderline N (%) <sup>β</sup>                                  |                                    | <b>161</b> (14.69)          |      | <b>97</b> (08.00)           | <0.001  |

| Abnormal N (%) <sup>β</sup>                                                                         | 50 (04.56) |                             | 26 (02.14) |                            |        |
|-----------------------------------------------------------------------------------------------------|------------|-----------------------------|------------|----------------------------|--------|
| <b>DIASTOLIC FUNCTION (additionally excluded people in atrial fibrillation)</b>                     |            |                             |            |                            |        |
| E (cm/sec)                                                                                          |            |                             |            |                            |        |
| A (cm/sec)                                                                                          | 1102       | <b>75.80</b> (66.40, 85.80) | 1215       | <b>75.40</b> (66.60, 85)   | 0.810  |
| E/A (no units)                                                                                      | 1102       | <b>66.63</b> (59.20, 75.40) | 1215       | <b>60.80</b> (54, 68.57)   | <0.001 |
| Deceleration time (ms)                                                                              | 1102       | <b>1.15</b> (0.96, 1.29)    | 1215       | <b>1.25</b> (1.10, 01.4)   | <0.001 |
| Medial e' (cm/sec)                                                                                  | 1102       | <b>144</b> (121, 162)       | 1215       | <b>148</b> (126, 169)      | <0.001 |
| Lateral e' (cm/sec)                                                                                 | 1102       | <b>10.70</b> (2.36)         | 1213       | <b>11.56</b> (2.27)        | <0.001 |
| Average e' (cm/sec)                                                                                 | 1101       | <b>7.98</b> (1.67)          | 1212       | <b>8.70</b> (1.65)         | <0.001 |
| Medial E/e' (no units)                                                                              | 1103       | <b>9.34</b> (1.82)          | 1213       | <b>10.13</b> (1.74)        | <0.001 |
| Lateral E/e' (no units)                                                                             | 1100       | <b>9.71</b> (8.23, 11.19)   | 1212       | <b>8.73</b> (7.57, 10.14)  | <0.001 |
| Average E/e'                                                                                        | 1101       | <b>7.08</b> (6.05, 8.42)    | 1213       | <b>6.58</b> (5.64, 7.79)   | <0.001 |
| LA volume <sup>i</sup> (ml/m <sup>2</sup> ) - 4c                                                    | 1102       | <b>8.35</b> (7.26, 9.75)    | 1213       | <b>7.71</b> (6.67, 8.86)   | <0.001 |
| LA volume <sup>i</sup> (ml/m <sup>2</sup> ) - 2C                                                    | 1014       | <b>11.08</b> (9.25, 12.9)   | 1161       | <b>11.45</b> (9.35, 13.64) | 0.029  |
| Average LA volume ml/m <sup>2</sup>                                                                 | 990        | <b>11.09</b> (9.44, 13.17)  | 1145       | <b>11.28</b> (9.38, 13.40) | 0.003  |
| TR max (m/sec)                                                                                      | 983        | <b>11.25</b> (9.54, 12.75)  | 1143       | <b>11.34</b> (9.64, 13.32) | 0.035  |
| TR max (m/sec)                                                                                      | 943        | <b>165.71</b> (39.72)       | 1100       | <b>176.79</b> (37.73)      | <0.001 |
| <b>Categories of LV diastolic dysfunction (participants with normal LV ejection fraction only)*</b> |            |                             |            |                            |        |
| None N (%) <sup>γ</sup>                                                                             |            | <b>922</b> (91.56)          |            | <b>1101</b> (95.24)        |        |
| Indeterminate N (%) <sup>γ</sup>                                                                    |            | <b>85</b> (08.44)           |            | <b>55</b> (04.76)          | 0.001  |
| Dysfunction N (%) <sup>γ</sup>                                                                      |            | <b>0</b> (0.0)              |            | <b>0</b> (0.0)             |        |

LV: left ventricle; LVIDD: LV internal diameter in diastole; LVISD: LV internal diameter in systole; PWT: Posterior wall thickness; GLS: Global longitudinal strain; E: passive ejection of left atrium; A: active atrial contraction; e': diastolic annular velocity. Participants with cardiac abnormalities excluded from the analysis.

**Supplementary Table 2: Descriptive data for VBC participants stratified by urban or rural residence**

| Variable units                                            | N   | RURAL                                                |     |                                                        |     | URBAN                                                |     |                                                        |  |
|-----------------------------------------------------------|-----|------------------------------------------------------|-----|--------------------------------------------------------|-----|------------------------------------------------------|-----|--------------------------------------------------------|--|
|                                                           |     | MALE<br>Mean SD/<br>Median IQR <sup>†</sup> /<br>N % | N   | FEMALE<br>Mean SD/<br>Median IQR <sup>†</sup> /<br>N % | N   | MALE<br>Mean SD/<br>Median IQR <sup>†</sup> /<br>N % | N   | FEMALE<br>Mean SD/<br>Median IQR <sup>†</sup> /<br>N % |  |
| <b>Clinical characteristics</b>                           |     |                                                      |     |                                                        |     |                                                      |     |                                                        |  |
| Age (years)                                               | 460 | <b>45.6</b> (1.06)                                   | 451 | <b>45.9</b> (1.14)                                     | 364 | <b>46.2</b> (1.06)                                   | 294 | <b>46.3</b> (1.08)                                     |  |
| Height (cm)                                               | 460 | <b>166.8</b> (6.0)                                   | 451 | <b>154.5</b> (5.8)                                     | 364 | <b>167.6</b> (6.8)                                   | 294 | <b>154.6</b> (5.7)                                     |  |
| Weight (kg)                                               | 460 | <b>66.0</b> (12.4)                                   | 451 | <b>60.1</b> (12.9)                                     | 364 | <b>71.7</b> (14.0)                                   | 294 | <b>66.1</b> (12.6)                                     |  |
| BMI (kg/m <sup>2</sup> )                                  | 460 | <b>23.6</b> (3.9)                                    | 451 | <b>25.1</b> (5.1)                                      | 364 | <b>25.4</b> (4.3)                                    | 294 | <b>27.6</b> (4.8)                                      |  |
| Body surface area (m <sup>2</sup> )                       | 460 | <b>1.73</b> (0.17)                                   | 451 | <b>1.57</b> (0.16)                                     | 364 | <b>1.80</b> (0.18)                                   | 294 | <b>1.64</b> (0.15)                                     |  |
| Systolic blood pressure (mmHg)                            | 460 | <b>128.9</b> (18.8)                                  | 451 | <b>123.0</b> (18.6)                                    | 364 | <b>132.4</b> (19.6)                                  | 294 | <b>128.0</b> (17.9)                                    |  |
| Diastolic blood pressure                                  | 460 | <b>79.7</b> (14.0)                                   | 451 | <b>74.8</b> (11.4)                                     | 364 | <b>79.6</b> (13.7)                                   | 294 | <b>77.0</b> (10.9)                                     |  |
| Pulse (bpm)                                               | 460 | <b>79.1</b> (11.7)                                   | 451 | <b>84.3</b> (11.1)                                     | 364 | <b>82.8</b> (12.0)                                   | 294 | <b>87.1</b> (11.2)                                     |  |
| SLI score                                                 | 364 | <b>31.2</b> (5.6)                                    | 294 | <b>30.7</b> (6.2)                                      | 460 | <b>28.2</b> (6.9)                                    | 451 | <b>27.5</b> (6.8)                                      |  |
| Tobacco use                                               |     |                                                      |     |                                                        |     |                                                      |     |                                                        |  |
| Never                                                     |     | <b>277</b> (60.2)                                    |     | <b>415</b> (92.0)                                      |     | <b>222</b> (61.0)                                    |     | <b>283</b> (96.3)                                      |  |
| Ex-user                                                   |     | <b>36</b> (7.8)                                      |     | <b>3</b> (0.7)                                         |     | <b>33</b> (9.1)                                      |     | <b>2</b> (0.7)                                         |  |
| Current user                                              |     | <b>147</b> (32.0)                                    |     | <b>33</b> (7.3)                                        |     | <b>109</b> (30.0)                                    |     | <b>9</b> (3.1)                                         |  |
| Alcohol consumption                                       |     |                                                      |     |                                                        |     |                                                      |     |                                                        |  |
| none                                                      |     | <b>173</b> (37.6)                                    |     | <b>451</b> (100.0)                                     |     | <b>148</b> (40.7)                                    |     | <b>294</b> (100.0)                                     |  |
| mild                                                      |     | <b>179</b> (38.9)                                    |     | <b>0</b> (0.0)                                         |     | <b>148</b> (40.7)                                    |     | <b>0</b> (0.0)                                         |  |
| moderate                                                  |     | <b>66</b> (14.4)                                     |     | <b>0</b> (0.0)                                         |     | <b>38</b> (10.4)                                     |     | <b>0</b> (0.0)                                         |  |
| heavy                                                     |     | <b>42</b> (9.1)                                      |     | <b>0</b> (0.0)                                         |     | <b>30</b> (8.2)                                      |     | <b>0</b> (0.0)                                         |  |
| <b>Cardiac size</b>                                       |     |                                                      |     |                                                        |     |                                                      |     |                                                        |  |
| LVIDd (mm)                                                | 460 | <b>45.6</b> (4.57)                                   | 451 | <b>42.9</b> (4.44)                                     | 364 | <b>45.6</b> (4.55)                                   | 294 | <b>43.2</b> (4.47)                                     |  |
| LVIDs (mm)                                                | 460 | <b>29.27</b> (3.12)                                  | 451 | <b>27.39</b> (2.81)                                    | 364 | <b>29.28</b> (3.19)                                  | 294 | <b>27.53</b> (3.06)                                    |  |
| Fractional shortening                                     | 460 | <b>0.36</b> (0.04)                                   | 451 | <b>0.36</b> (0.04)                                     | 364 | <b>0.36</b> (0.03)                                   | 294 | <b>0.36</b> (0.05)                                     |  |
| PWT (mm) <sup>†</sup>                                     | 460 | <b>9.0</b> (8.3, 9.3)                                | 451 | <b>8.7</b> (8.0, 9.0)                                  | 364 | <b>9.0</b> (8.7, 9.7)                                | 294 | <b>9.0</b> (8.3, 9.0)                                  |  |
| Septal thickness (mm)                                     | 460 | <b>9.9</b> (1.1)                                     | 451 | <b>9.3</b> (1.0)                                       | 364 | <b>10.0</b> (1.2)                                    | 294 | <b>9.4</b> (1.0)                                       |  |
| Relative wall thickness <sup>†</sup>                      | 460 | <b>0.39</b> (0.36, 0.42)                             | 451 | <b>0.39</b> (0.36, 0.43)                               | 364 | <b>0.40</b> (0.37, 0.43)                             | 294 | <b>0.40</b> (0.37, 0.44)                               |  |
| LVEDV 4c (ml) <sup>†</sup>                                | 460 | <b>69.1</b> (59.8, 83.3)                             | 451 | <b>58.9</b> (49.2, 70.9)                               | 364 | <b>66.5</b> (55.6, 82.5)                             | 294 | <b>56.7</b> (49.6, 68.2)                               |  |
| LVESV 4c (ml) <sup>†</sup>                                | 460 | <b>23.7</b> (19.9, 28.4)                             | 451 | <b>20.2</b> (16.9, 23.9)                               | 364 | <b>23.0</b> (18.9, 28.3)                             | 294 | <b>19.7</b> (17.0, 23.3)                               |  |
| LV mass absolute (g) <sup>†</sup>                         | 460 | <b>117.0</b> (98.8, 134.0)                           | 451 | <b>97.3</b> (83.8, 112.0)                              | 364 | <b>116.0</b> (99.3, 136.0)                           | 294 | <b>102.0</b> (85.4, 118.0)                             |  |
| LV mass <sup>i</sup> indexed for BSA, (g/m <sup>2</sup> ) | 460 | <b>67.4</b> (58.9, 77.2)                             | 451 | <b>62.3</b> (54.9, 70.7)                               | 364 | <b>64.8</b> (57.3, 75.6)                             | 294 | <b>61.7</b> (54.9, 70.3)                               |  |
| <b>Categories of LV re-modelling/hypertrophy</b>          |     |                                                      |     |                                                        |     |                                                      |     |                                                        |  |
| None (n, %)                                               |     | <b>330</b> (70.8)                                    |     | <b>253</b> (68.4)                                      |     | <b>296</b> (64.5)                                    |     | <b>182</b> (60.9)                                      |  |
| Concentric remodelling (n, %)                             |     | <b>124</b> (26.6)                                    |     | <b>107</b> (28.9)                                      |     | <b>141</b> (30.7)                                    |     | <b>107</b> (35.8)                                      |  |
| Concentric hypertrophy (n, %)                             |     | <b>3</b> (0.6)                                       |     | <b>5</b> (1.4)                                         |     | <b>8</b> (1.7)                                       |     | <b>4</b> (1.3)                                         |  |
| Eccentric hypertrophy (n, %)                              |     | <b>9</b> (1.9)                                       |     | <b>5</b> (1.4)                                         |     | <b>14</b> (3.1)                                      |     | <b>6</b> (2.0)                                         |  |
| <b>SYSTOLIC FUNCTION</b>                                  |     |                                                      |     |                                                        |     |                                                      |     |                                                        |  |
| LV ejection fraction (%) <sup>†</sup>                     | 460 | <b>65.4</b> (63.1, 67.4)                             | 364 | <b>65.4</b> (63.3, 67.2)                               | 451 | <b>65.8</b> (63.6, 67.6)                             | 294 | <b>65.5</b> (63.7, 67.2)                               |  |
| Low LV ejection fraction (n, %)                           |     | <b>3</b> (0.6)                                       |     | <b>3</b> (0.8)                                         |     | <b>1</b> (0.2)                                       |     | <b>2</b> (0.7)                                         |  |
| Average GLS                                               | 460 | <b>-19.7</b> (2.0)                                   | 364 | <b>-18.4</b> (2.2)                                     | 450 | <b>-20.1</b> (2.1)                                   | 294 | <b>-19.2</b> (2.3)                                     |  |

**Categories of GLS**

|                   |                   |                   |                   |                   |
|-------------------|-------------------|-------------------|-------------------|-------------------|
| Normal (n, %)     | <b>431</b> (92.5) | <b>286</b> (77.3) | <b>423</b> (92.4) | <b>260</b> (87.0) |
| Borderline (n, %) | <b>27</b> (5.8)   | <b>56</b> (15.1)  | <b>26</b> (5.7)   | <b>28</b> (9.4)   |
| Abnormal (n, %)   | <b>8</b> (1.7)    | <b>28</b> (7.6)   | <b>9</b> (2.0)    | <b>11</b> (3.7)   |

**DIASTOLIC FUNCTION additionally excluded people in atrial fibrillation**

|                                                                  |     |                          |     |                          |     |                          |     |                          |
|------------------------------------------------------------------|-----|--------------------------|-----|--------------------------|-----|--------------------------|-----|--------------------------|
| Mitral - E (cm/sec) <sup>†</sup>                                 | 460 | <b>74.8</b> (65.0, 85.4) | 364 | <b>73.9</b> (64.8, 82.8) | 448 | <b>77.6</b> (69.4, 89.3) | 293 | <b>80.4</b> (71.1, 89.6) |
| Mitral - A (cm/sec) <sup>†</sup>                                 | 460 | <b>60.4</b> (53.0, 68.3) | 364 | <b>60.6</b> (53.2, 67.1) | 448 | <b>64.2</b> (56.1, 73.1) | 293 | <b>65.4</b> (58.6, 74.4) |
| Mitral E/A <sup>†</sup>                                          | 460 | <b>1.2</b> (1.09, 1.43)  | 364 | <b>1.24</b> (1.07, 1.39) | 448 | <b>1.24</b> (1.10, 1.39) | 293 | <b>1.22</b> (1.11, 1.35) |
| Deceleration time (ms)                                           | 460 | <b>152.4</b> (31.0)      | 364 | <b>142.0</b> (30.5)      | 448 | <b>145.9</b> (31.6)      | 293 | <b>138.8</b> (29.7)      |
| Mitral E/average e' <sup>†</sup>                                 | 460 | <b>7.8</b> (6.8, 9.1)    | 364 | <b>8.1</b> (7.1, 9.4)    | 448 | <b>8.5</b> (7.2, 9.5)    | 293 | <b>8.8</b> (7.8, 10.0)   |
| LA volume <sup>i</sup> (ml/m <sup>2</sup> ) - 4c <sup>†</sup>    | 460 | <b>11.8</b> (10.1, 13.9) | 364 | <b>11.3</b> (9.6, 13.3)  | 450 | <b>12.1</b> (10.4, 14.4) | 294 | <b>11.7</b> (9.8, 13.7)  |
| Average LA volume <sup>i</sup> (ml/m <sup>2</sup> ) <sup>†</sup> | 460 | <b>11.6</b> (10.2, 13.3) | 364 | <b>11.3</b> (9.8, 13.0)  | 450 | <b>12.2</b> (10.6, 14.2) | 294 | <b>11.7</b> (10.0, 13.3) |
| TR max m/sec                                                     | 458 | <b>174.7</b> (40.1)      | 364 | <b>173.1</b> (37.6)      | 450 | <b>180.1</b> (37.3)      | 294 | <b>178.9</b> (38.7)      |

**Categories of LV diastolic dysfunction participants with normal LV ejection fraction only\***

|                      |                    |                    |                    |                    |
|----------------------|--------------------|--------------------|--------------------|--------------------|
| None (n, %)          | <b>449</b> (98.68) | <b>359</b> (99.45) | <b>447</b> (99.33) | <b>290</b> (98.98) |
| Indeterminate (n, %) | <b>6</b> (1.32)    | <b>2</b> (0.55)    | <b>3</b> (0.67)    | <b>3</b> (1.02)    |
| Dysfunction (n, %)   | <b>0</b>           | <b>0</b>           | <b>0</b>           | <b>0</b>           |

**Co-morbidities**

|                              |                    |                    |                   |                   |
|------------------------------|--------------------|--------------------|-------------------|-------------------|
| Diabetes (n, %)              | <b>113</b> (24.57) | <b>99</b> (27.20)  | <b>79</b> (17.52) | <b>79</b> (26.87) |
| Hypertension (n, %)          | <b>138</b> (30.00) | <b>130</b> (35.71) | <b>93</b> (20.62) | <b>80</b> (27.21) |
| Myocardial infarction (n, %) | <b>4</b> (0.87)    | <b>4</b> (1.10)    | <b>0</b> (0.00)   | <b>0</b> (0.00)   |
| Atrial fibrillation (n, %)   | <b>0</b> (0.00)    | <b>0</b> (0.00)    | <b>1</b> (0.22)   | <b>0</b> (0.00)   |

Overweight (BMI ≥25 kg/m<sup>2</sup>), n (Obesity (BMI ≥30 kg/m<sup>2</sup>), n (%)

---

LV: left ventricle; LVIDD:LV internal diameter in diastole; LVISD: LV internal diameter in systole; PWT: Posterior wall thickness; GLS: Global longitudinal strain; E: passive ejection of left atrium; A: active atrial contraction; e': diastolic annular velocity. Participants with known cardiac disease excluded from the analysis.



**Supplementary table 3. Comparison of Cardiac structure and function between IndEcho and other published studies form different ethnicities**

| Ethnicity                     | SABRE <sup>1</sup> |                           |                                    | LOLIPOP <sup>2</sup>   |                                         | NORRE study <sup>3</sup> | Sullere et al <sup>4</sup> | INDEA study <sup>5</sup> | IndEcho (Current study) |              | WASE <sup>6</sup>                | 2015 ASE/EACVI guidelines        |
|-------------------------------|--------------------|---------------------------|------------------------------------|------------------------|-----------------------------------------|--------------------------|----------------------------|--------------------------|-------------------------|--------------|----------------------------------|----------------------------------|
|                               | European (n=427)   | African Caribbean (n=143) | Migrant South Asians in UK (n=325) | European white (n=199) | Indian Asian migrants in the UK (n=259) | Caucasians (n=734)       | Indians (n=707)            | Indians (n=880)          | NDBC (n=753)            | VBC (n=1564) | Indians range                    | N=839                            |
| Age                           | 70.1 (6.2)         | 70.9 (5.8)                | 69.2 (6.0)                         | 51.8 (8.5)             | 50.6 (8.5)                              | 45.8 (13.3)              | 40.7 (11.4)                | 39.7 (12.3)              | 46.13 (1.10)            | 45.93 (1.13) | -                                | 45 (32 – 65)                     |
| Height, m                     | 1.73 (0.07)        | 1.72 (0.06)               | 1.69 (0.06)                        | -                      | -                                       | 1.70 (0.96)              | 1.66 (1.01)                | -                        | 1.64 (0.09)             | 1.61 (0.09)  | -                                | 167 (160–174)                    |
| Weight, kg                    | 80.4 (11.7)        | 71.7 (9.5)                | 79.3 (11.3)                        | -                      | -                                       | 69.5 (12.0)              | 74.6 (14.7)                | -                        | 76.4 (15.0)             | 65.6 (13.6)  | -                                | 67 (58–77)                       |
| BMI                           | -                  | -                         | -                                  | 24.4 (2.7)             | 25.0 (2.6)                              | 24.0 (3.0)               | 27.2 (4.9)                 | 23.7 (2.1)               | 28.4 (5.0)              | 25.2 (4.7)   | -                                | -                                |
| BSA                           | -                  | -                         | -                                  | 1.90 (0.2)             | 1.80 (0.2)                              | 1.80 (0.2)               | -                          | 1.69 (0.15)              | 1.83 (0.20)             | 1.69 (0.19)  | -                                | -                                |
| LVIDd, cm                     | 4.52 (0.02)        | 4.46 (0.03)               | 4.39 (0.02)                        | -                      | -                                       | 4.43 (0.48)              | 4.62 (0.44)                | 4.22 (0.39)              | 4.82 (0.61)             | 4.40 (0.52)  | 3.4 to 5.2 (M)<br>3.2 to 4.9 (M) | 4.2 to 5.8 (M)<br>3.8 to 5.2 (F) |
| LVEDV, ml                     | 84.6 (0.9)         | 79.0 (1.6)                | 77.3 (1.02)                        | -                      | -                                       | 92.8 (24.8)              | 88.1 (20.7)                | 71.5 (17.5)              | 55.3 (14.7)             | 63.1 (15.2)  | 47 to 113 (M)<br>40 to 91 (F)    | 62 to 150 (M)<br>46 to 106 (F)   |
| IVS, cm                       | 1.15 (0.1)         | 1.25 (0.02)               | 1.10 (0.1)                         | -                      | -                                       | 0.86 (0.2)               | 1.07 (0.11)                | 0.89 (0.1)               | 0.96 (0.2)              | 0.97 (0.1)   | -                                | -                                |
| PWT, cm                       | 1.02 (0.01)        | 1.09 (0.01)               | 1.00 (0.01)                        | -                      | -                                       | 0.88 (0.2)               | 1.06 (0.1)                 | -                        | 0.87 (0.2)              | 0.88 (0.1)   | -                                | -                                |
| RWT                           | 0.46 (0.004)       | 0.49 (0.007)              | 0.46 (0.004)                       | 0.35 (0.07)            | 0.37 (0.07)                             | -                        | 0.47 (0.05)                | -                        | 0.38 (0.08)             | 0.40 (0.06)  | -                                | -                                |
| LV mass, g                    | 176.3 (2.1)        | 190.8 (3.7)               | 159.8 (2.4)                        | 159.3 (45.3)           | 132.5 (33.4)                            | 126.8 (37.4)             | 176.8 (37.7)               | -                        | 126.2 (33.5)            | 110.5 (27.6) | -                                | -                                |
| LV mass/BSA, g/m <sup>2</sup> | 92.9 (1.04)        | 101.0 (1.8)               | 90.2 (1.2)                         | 92.1 (2.5)             | 80.2 (1.9)                              | 69.9 (17.5)              | 96.9 (22.2)                | -                        | 69.6 (18.3)             | 65.4 (13.8)  | 40 to 88 (M)<br>37 to 78 (M)     | 43 – 102 (M)<br>36 – 89 (F)      |
| E/A ratio                     | -                  | -                         | -                                  | 1.2 (0.3)              | 1.2 (0.4)                               | -                        | 1.4 (0.4)                  | 1.5 (0.5)                | 1.1 (0.23)              | 1.2 (0.27)   | -                                | -                                |
| EF (%)                        | -                  | -                         | -                                  | 62 (5)                 | 62 (6)                                  | 63.9 (4.9)               | 61.2 (5.1)                 | 61.7 (5.9)               | 64.0 (4.4)              | 65.3 (3.0)   | 58 to 69 (M)<br>59 to 69 (F)     | 52 – 72 (M)<br>54 – 74 (F)       |
| GLS%                          | -                  | -                         | -                                  | -                      | -                                       | -                        | -                          | - 21.0 (2.9)             | -18.14 (3.14)           | -19.4 (2.2)  | -17 to -25 (M)<br>-18 to -26 (F) | -                                |

1. Park et al., SABRE study. *Hypertension*. 2013; 2. Chahal et al., LOLIPOP study. *Heart* 2010; 3. Kou et al., The NORRE study. *European Heart Journal–Cardiovascular Imaging* 2014; 4. Sullere et al. *Indian Heart Journal* 2018; 5. Sengupta et al., INDEA study *Int J Cardiovasc Imaging*. 2021; 6. Asch et al. WASE study *J Am Soc Echocardiogr*. 2019; 7. Lang et al., ASE/EACVI guidelines. *J Am Soc Echocardiogr*. 2015
